# Supplementary material for: A greener alternative for inline nitrate reduction in the sequential injection determination of NOx in natural waters: replacement of cadmium reduction by UV radiation
Source: Royal Society of Chemistry journal article supplement (doi:10.1039/c7ay00261k), 2017-01-01
Supplement: c7ay00261k1.pdf [file c7ay00261k1.pdf]

Electronic Supplementary Information

**Greener alternative for inline nitrate reduction in the sequential injection determination of NO<sub>x</sub> in natural water: replacement of cadmium reduction by UV radiation**

Ana Machado<sup>a,b</sup>, Graham Marshall<sup>c</sup>, Adriano A. Bordalo<sup>a,b</sup>, Raquel B. R. Mesquita<sup>a,d\*</sup>

<sup>a</sup> ICBAS/UP - Instituto de Ciências Biomédicas Abel Salazar, Universidade do Porto, Rua Jorge Viterbo Ferreira 228, P 4050-313 Porto, Portugal

<sup>b</sup> CIIMAR/CIMAR - Centro Interdisciplinar de Investigação Marinha e Ambiental, Universidade do Porto, Terminal de cruzeiros do Porto de Leixões, Av. General Norton de Matos, 4050-208 Matosinhos, Portugal.

<sup>c</sup> Global FIA, Fox Island, USA

<sup>d</sup> Universidade Católica Portuguesa, CBQF - Centro de Biotecnologia e Química Fina – Laboratório Associado, Escola Superior de Biotecnologia, Rua Arquiteto Lobão Vital, Apartado 2511, 4202-401 Porto, Portugal

\*[rmesquita@porto.ucp.pt](mailto:rmesquita@porto.ucp.pt)

**ESI Figure 1**

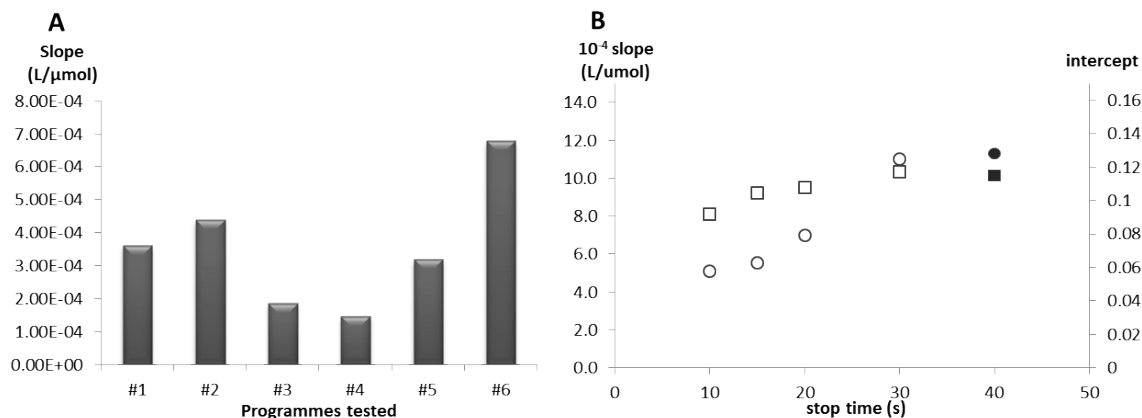

**ESI Fig. 1.** Influence on the determination sensitivity, reaction slope, of the: A, sequences using different combinations of volume; B, the reaction time. Slope (○); Intercept (□); the solid points represent the chosen stop time.

**ESI Figure 2**

reduction (%)

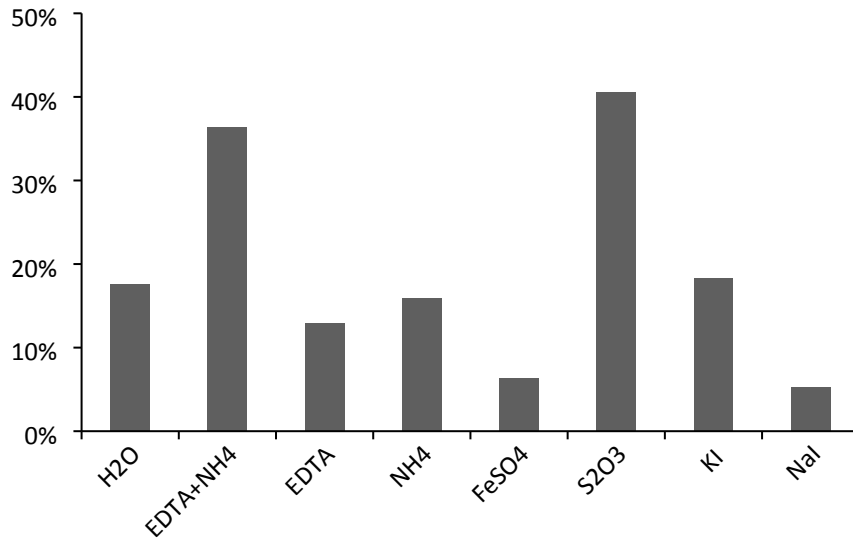

**ESI Fig. 2.** Influence of different conditioner solutions on the nitrate reduction rate percentage.

**ESI Figure 3**

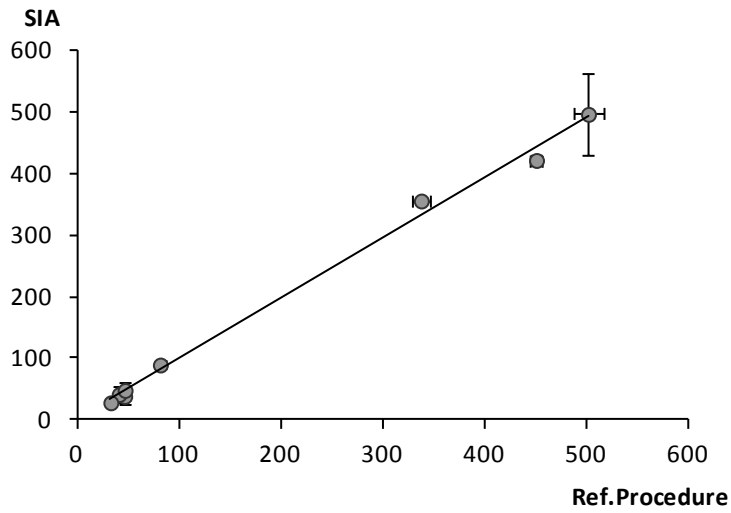

**ESI Fig. 3.** Plot of the results obtained with the developed sequential injection analysis (SIA) method against the results obtained with the reference procedure; the line represents the established linear relationship; the error bars correspond to the standard deviation.
